# Supplementary material for: Bioactivity-Guided Screening of Wound-Healing Active Constituents from American Cockroach (Periplaneta americana)
Source: PubMed Central journal article supplement (PMC6017267; doi:10.3390/molecules23010101), 2018-01-20
Supplement: molecules-23-00101-s001.pdf [file molecules-23-00101-s001.pdf]

Retention time: 1.471; Compound: P1

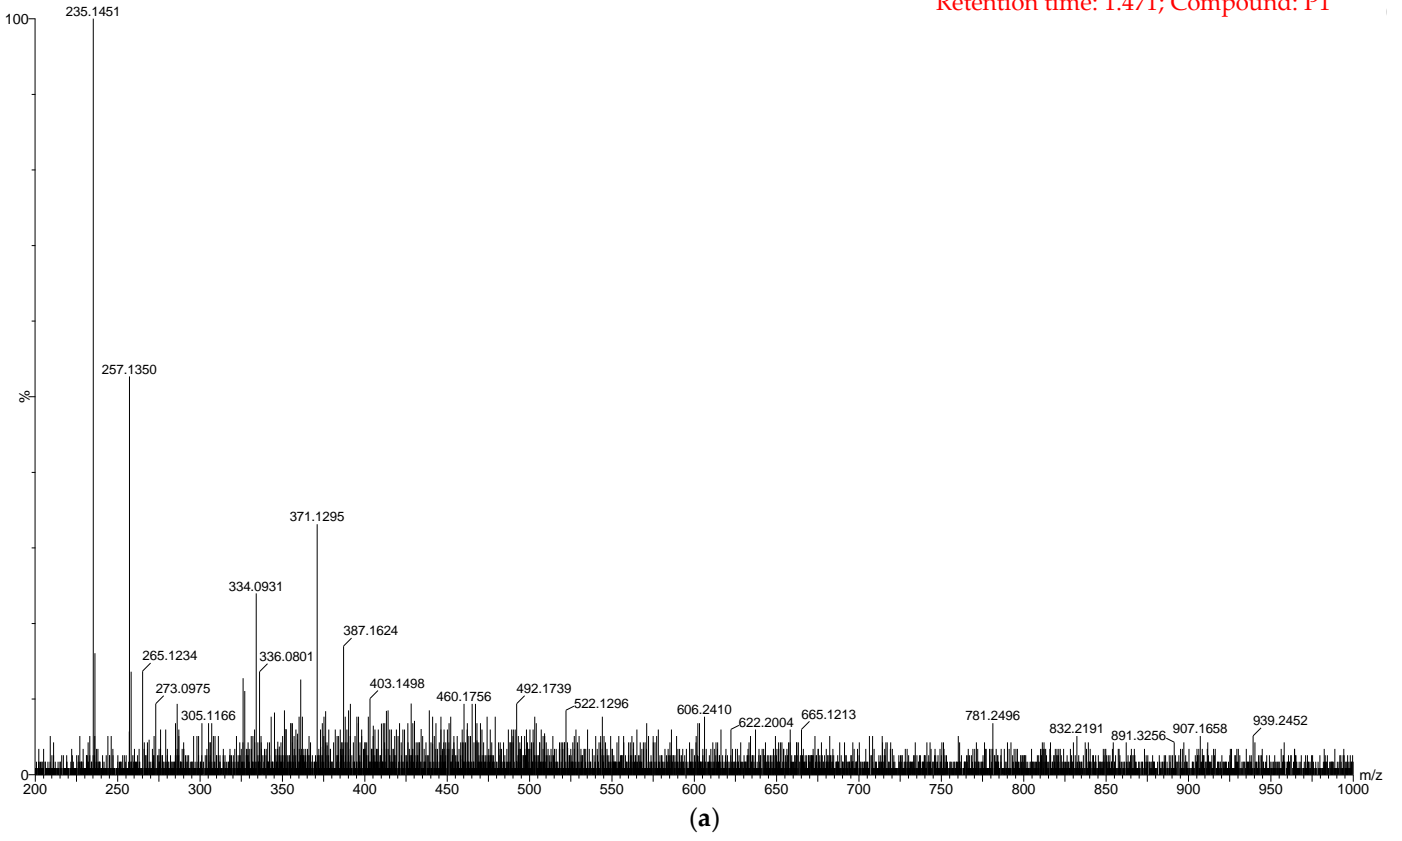

Retention time: 1.590; Compound: P2

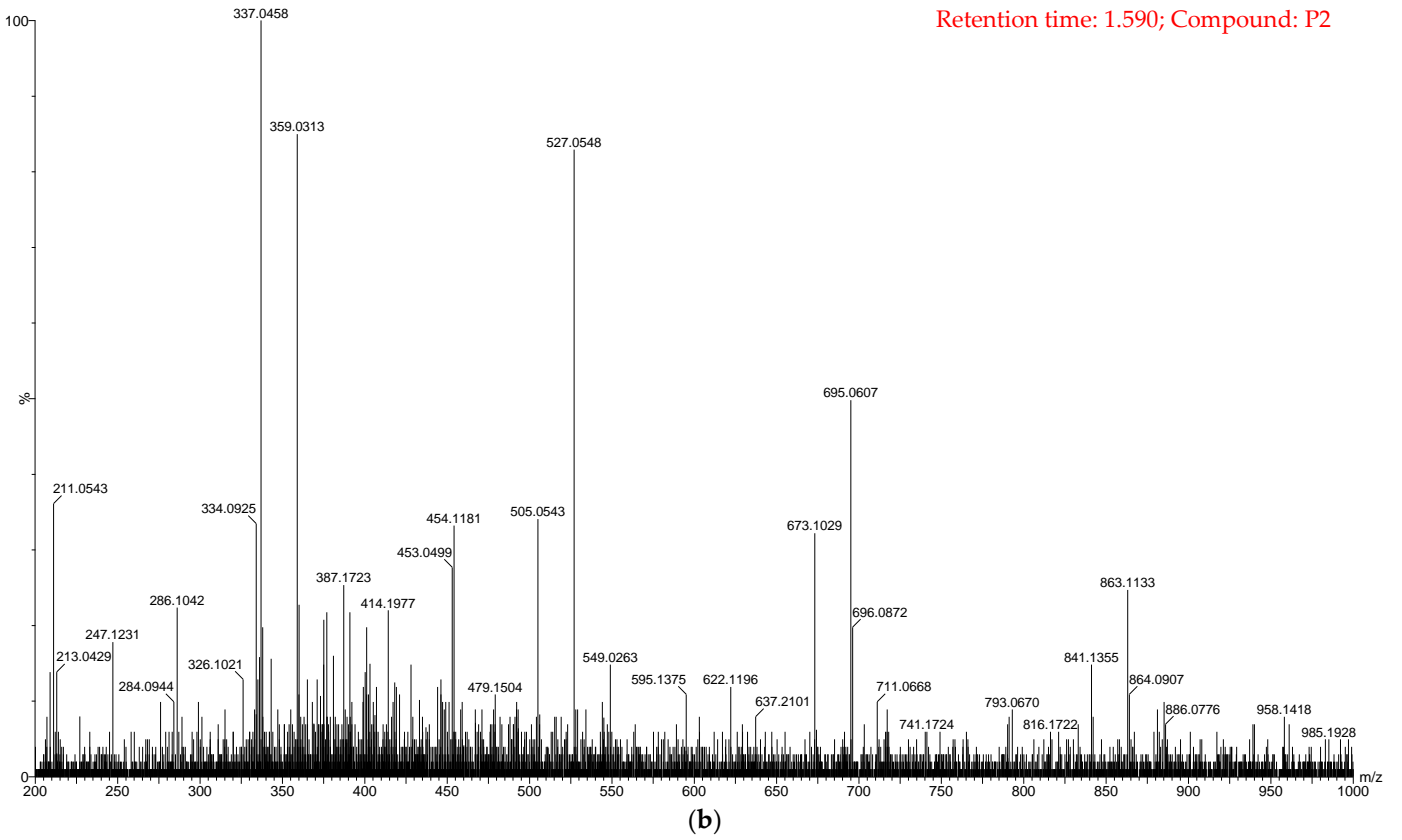

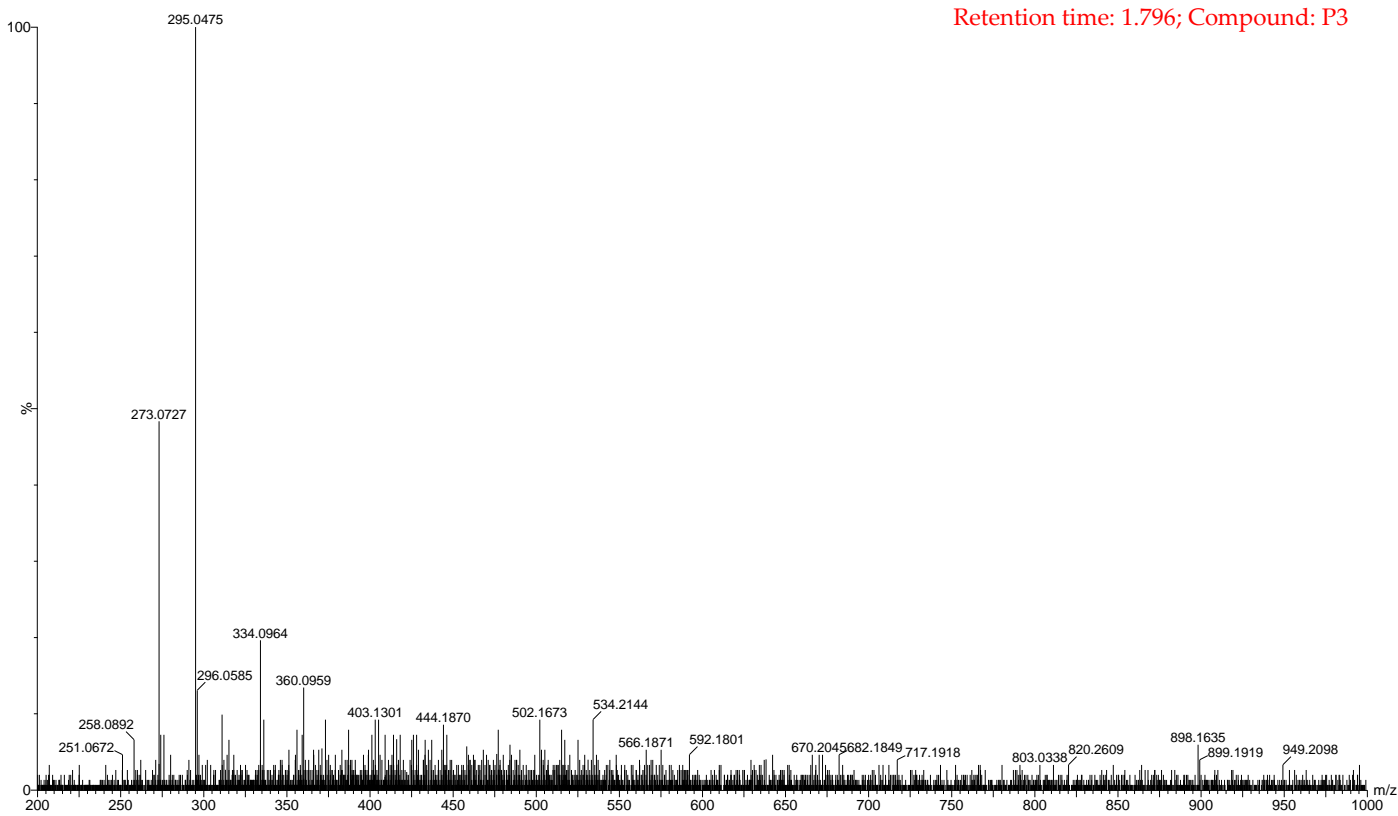

(c)

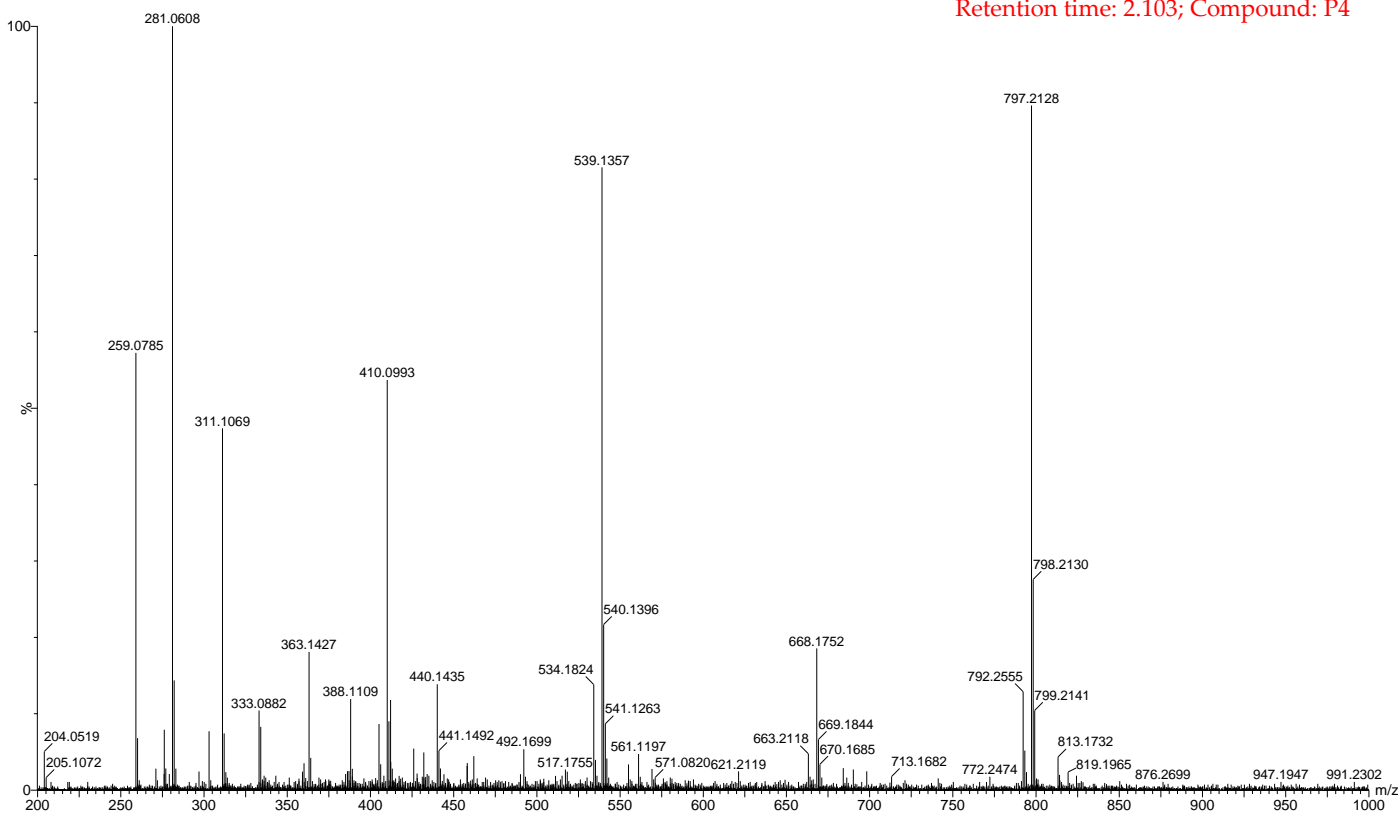

(d)

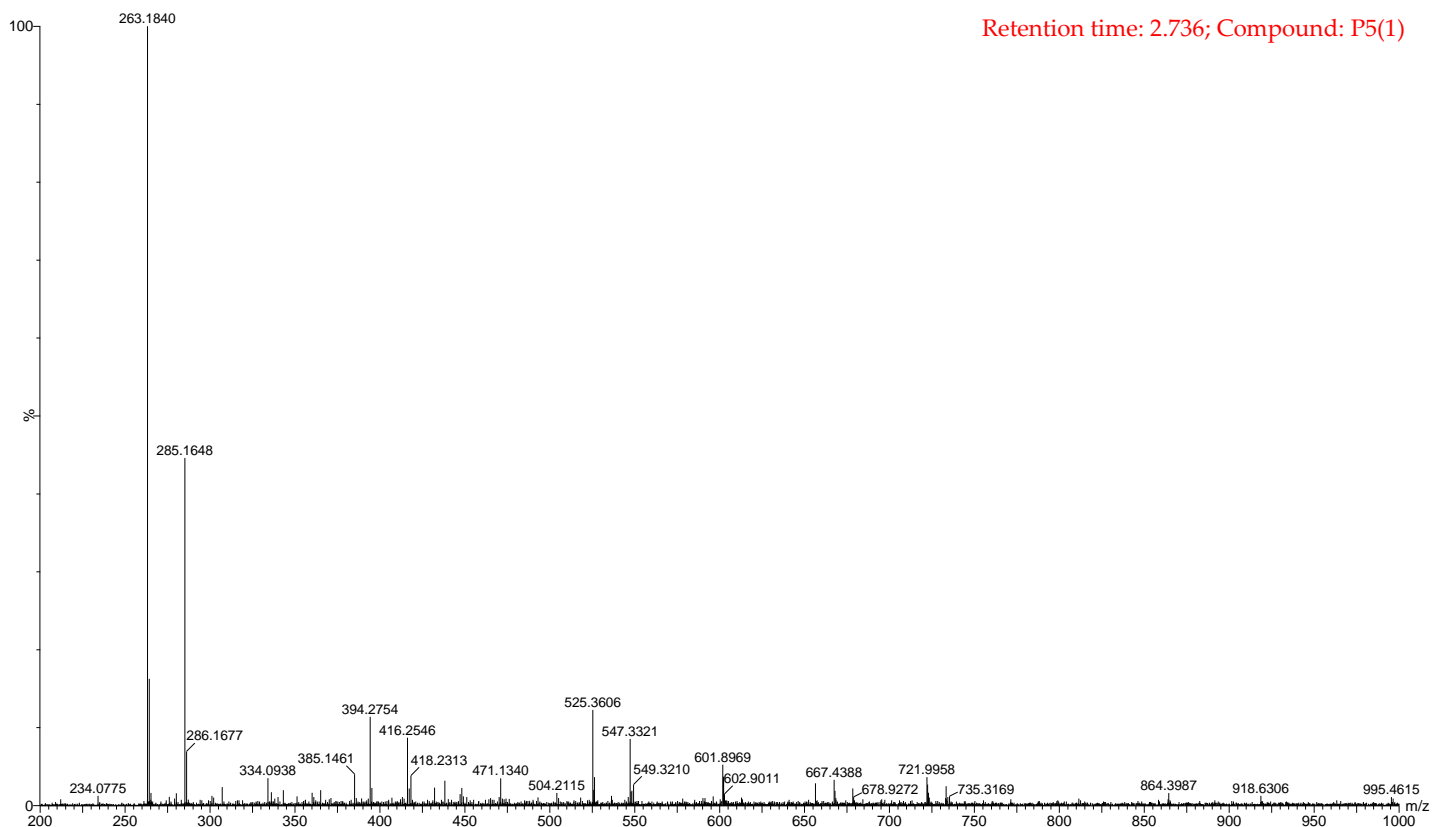

(e)

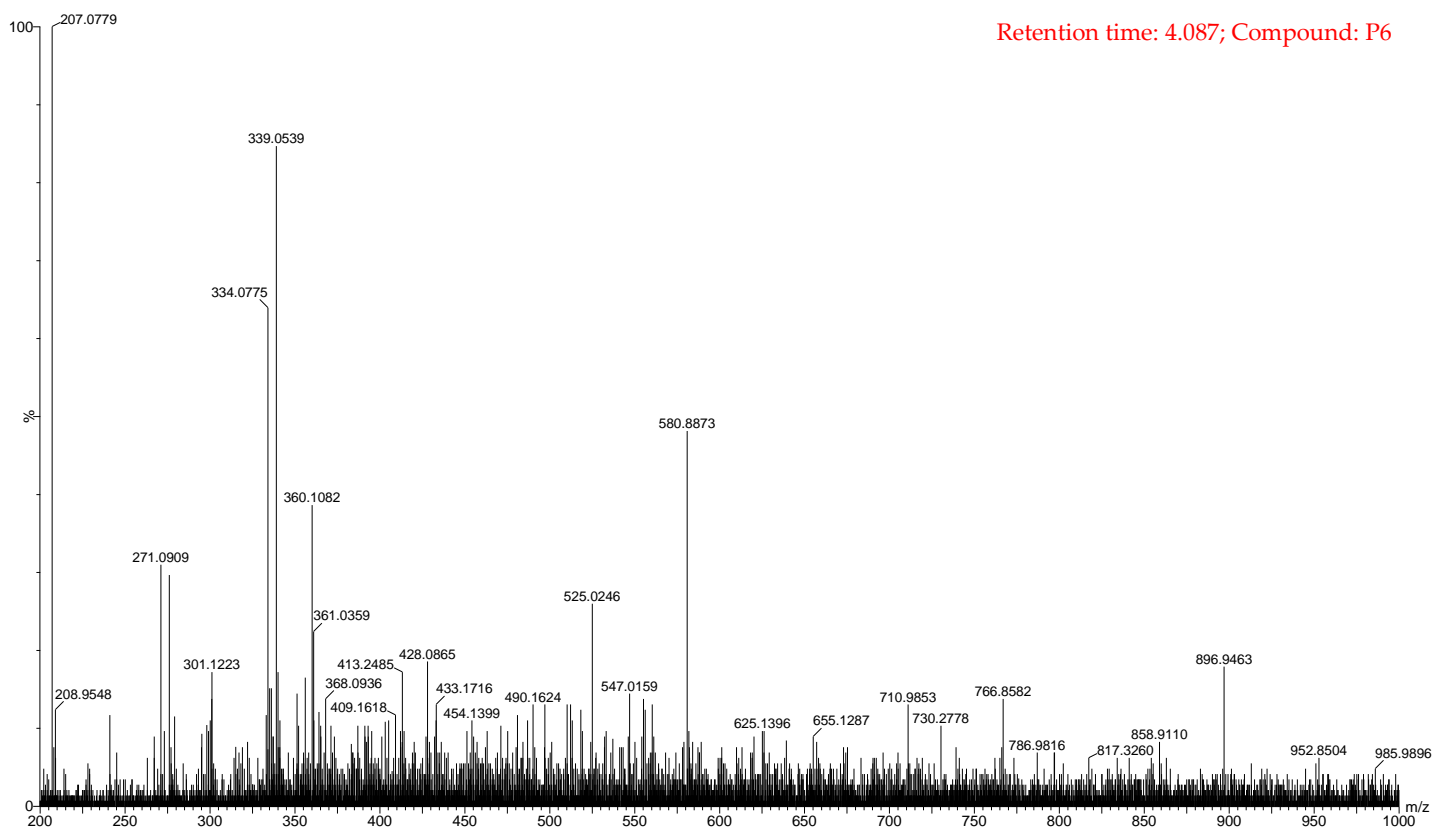

(f)

Retention time: 4.720; Compound: P7

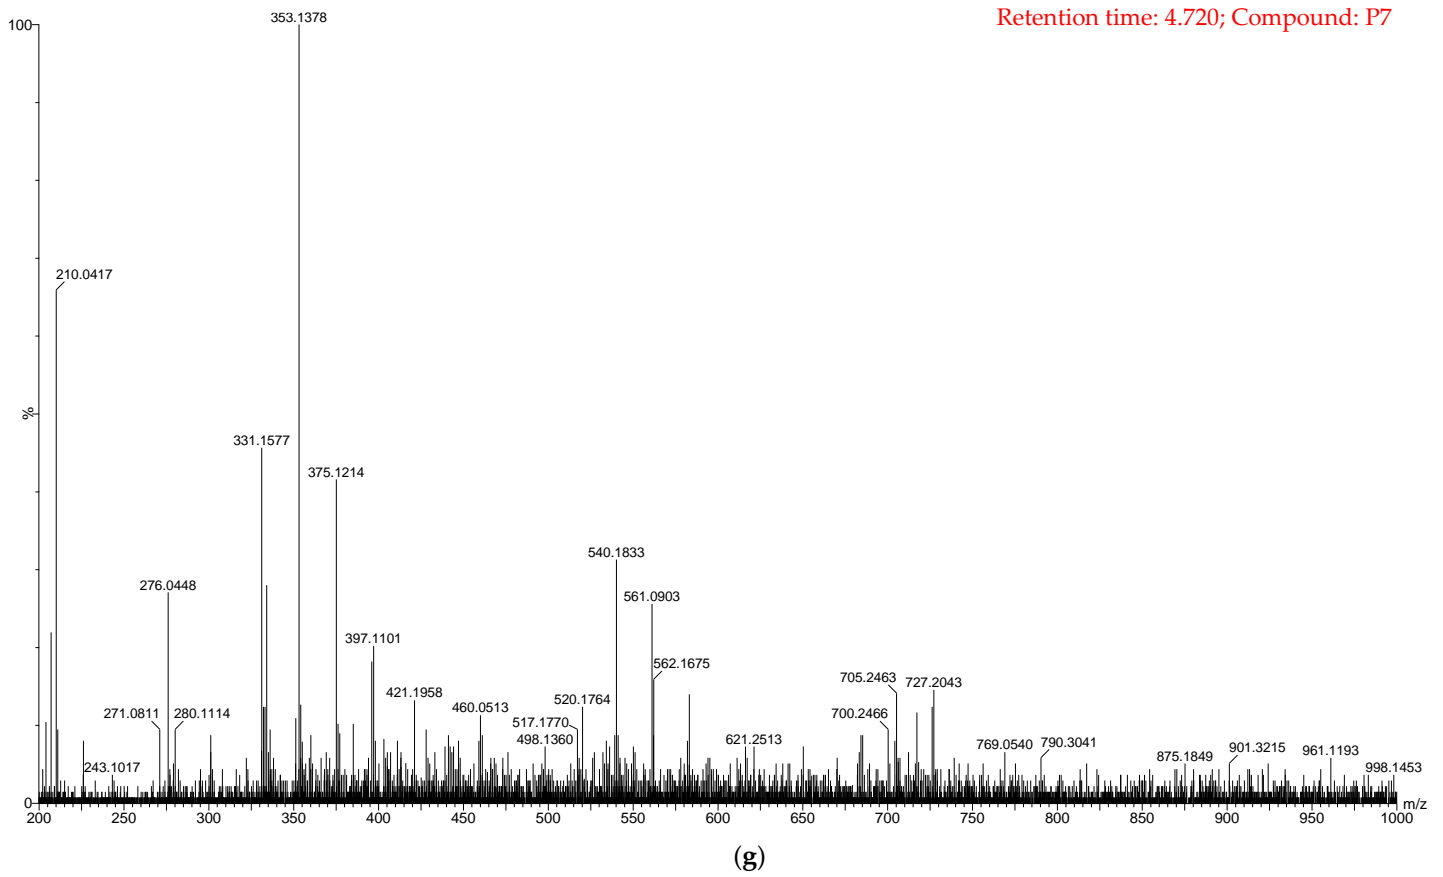

**Figure S1.** The corresponding mass spectrum data of seven peaks with retention times at 1.471 min (a), 1.590 min (b), 1.796 min (c), 2.103 min (d), 2.736 min (e), 4.087 min (f), and 4.720 min (g).
